# Supplementary material
Source: Royal Society of Chemistry journal article supplement (doi:10.1039/d6nj00427j)
Supplement: d6nj00427j1.pdf [file d6nj00427j1.pdf]

## Supporting Materials

### High-Efficient hydrogenation reduction of Nitrate to Ammonia and Nitrogen via Ni-MOF-74 Reduced-Derived Ni-Based Catalyst

Ling-Feng Zou<sup>1</sup>, Zi-Sheng Chao<sup>\*,2</sup>, Tao Xiang<sup>3</sup>, Mou-Huan Song<sup>3</sup>, Jia-Ao Xia<sup>3</sup>,  
An Li<sup>\*,3</sup>

<sup>1</sup> College of Civil Engineering, Changsha University of Science and Technology, Changsha, 410082, China

<sup>2</sup> College of Materials Science and Engineering, Changsha University of Science and Technology, Changsha, Hunan, 410114, China

<sup>3</sup> School of Chemistry and Chemical Engineering, Hunan Institute of Science and Technology, Yueyang, Hunan, 414006, China

**\*Corresponding author.** Email: zschao@yahoo.com (Z.S. Chao);  
anleechn@hotmail.com (A. Li)

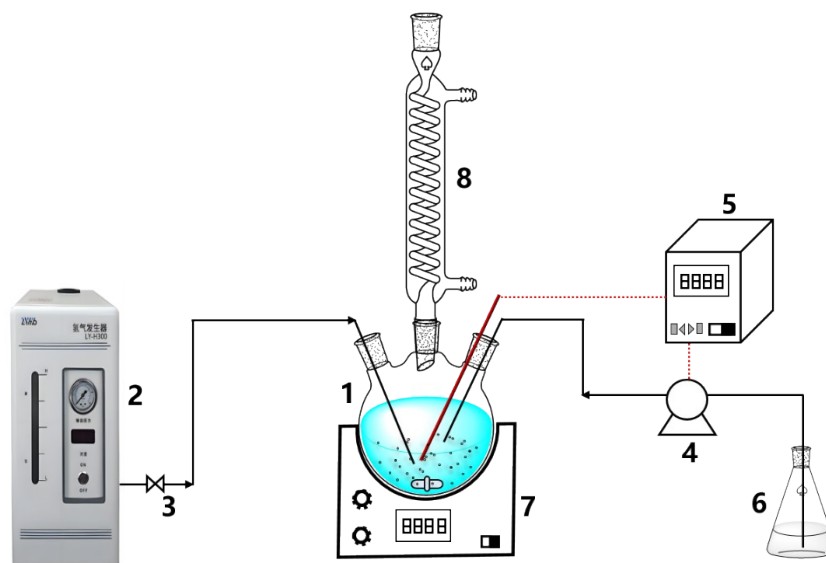

**Fig. 1S** the batch reaction apparatus of catalytic hydrogen reduction of nitrate

1. Reactor; 2. Hydrogen generator; 3. One-way valve; 4. Peristaltic pump; 5. pH meter; 6. Acid solution; 7. Temperature controller; 8. Condenser.

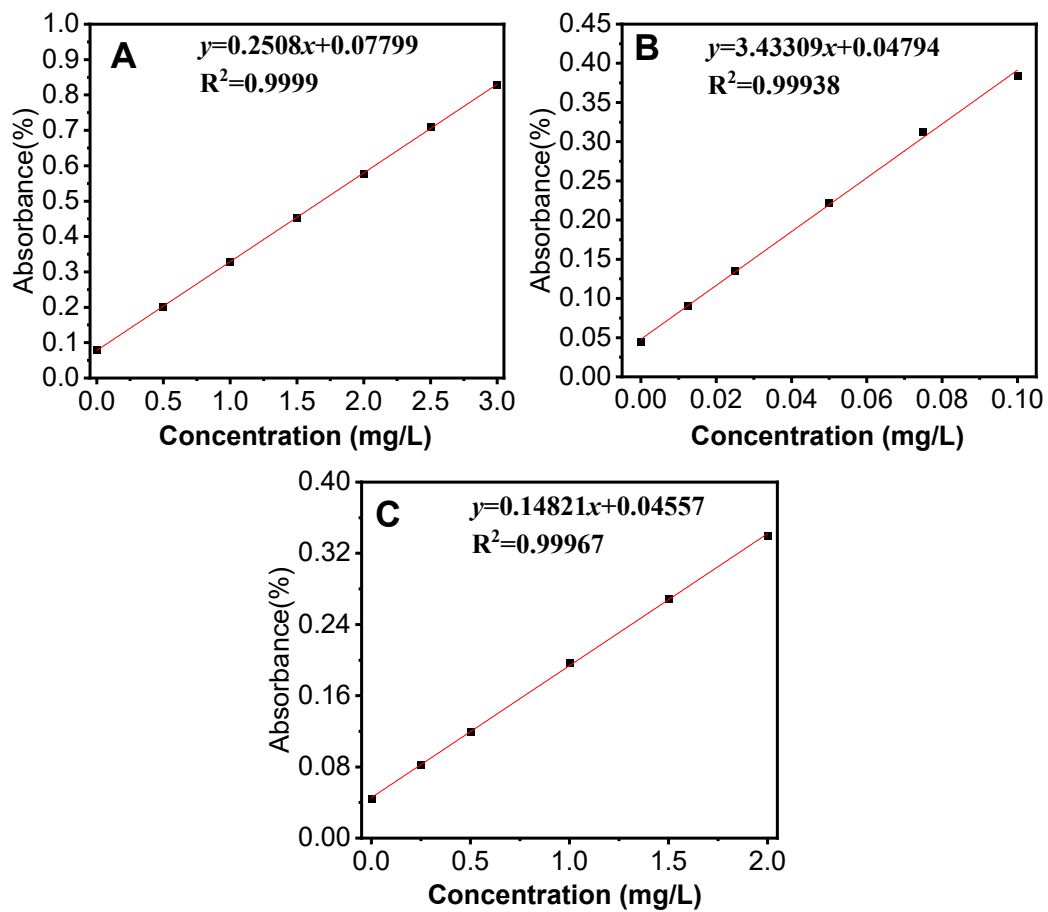

**Fig. 2S** The standard curve of  $\text{NO}_3^-$ -N (A),  $\text{NO}_2^-$ -N (B), and  $\text{NH}_4^+$ -N (C) concentration with absorbance value

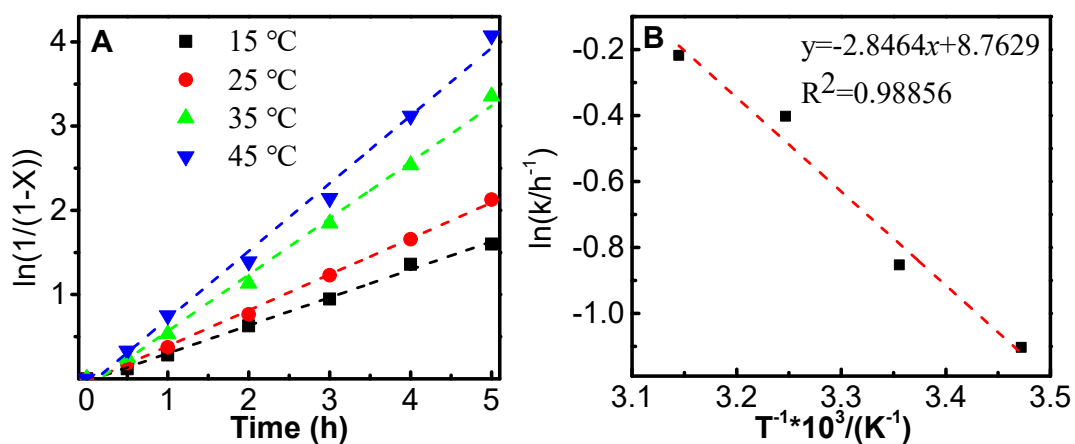

**Fig. 3S.** Kinetic fitting of first-order reaction at 15, 25, 35, 45 °C for  $\text{NO}_3^-$  degradation (A) and the linear fitting of  $1/T$  with  $\ln k$  (B)

**Table 1S** Kinetic fitting data of  $\text{NO}_3^-$  degradation at different temperatures with MOF-47-400

| Temperature/°C | Fitted linear equation | $k_{\text{obs}}/\text{h}^{-1}$ | $R^2$  |
|----------------|------------------------|--------------------------------|--------|
| 15             | $y = 0.3319x - 0.030$  | 0.3319                         | 0.9971 |
| 25             | $y = 0.4260x - 0.0384$ | 0.4260                         | 0.9985 |
| 35             | $y = 0.6690x - 0.1024$ | 0.6690                         | 0.9958 |
| 45             | $y = 0.8041x - 0.0912$ | 0.8041                         | 0.9943 |

$k_{\text{obs}}$ : speed constant of first-order reaction for  $\text{NO}_3^-$  degradation

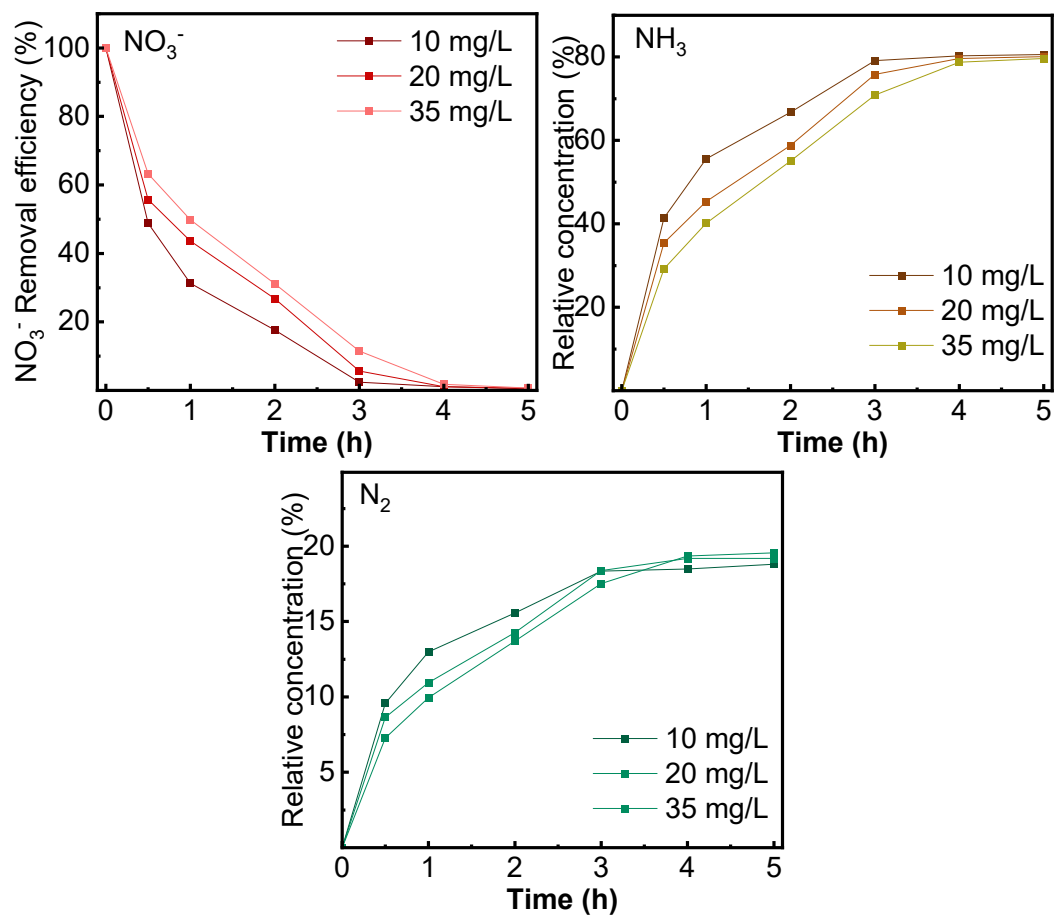

**Fig. 4S** The effect of Lower nitrate concentration of 10, 20 and 35 mg/L on the hydrogenation reduction performance of Ni-MOF-74-400 at 25 °C during time processing.

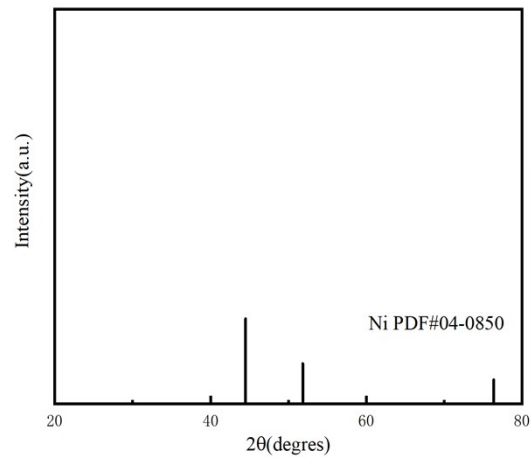

**Fig. 5S.** the standard PDF card of Ni

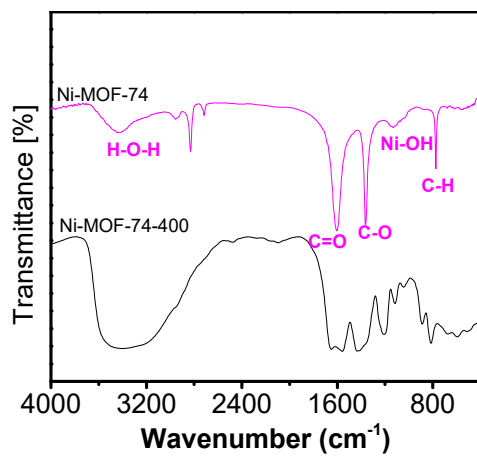

**Fig. 6S** the FT-IR spectra for the Ni-MOF-74 and its derived-catalyst
